# Supplementary material for: Pt quantum dots deposited on N-doped (BiO)2CO3: enhanced visible light photocatalytic NO removal and reaction pathway
Source: Royal Society of Chemistry journal article supplement (doi:10.1039/c6cy02444k), 2017-01-01
Supplement: c6cy02444k1.pdf [file c6cy02444k1.pdf]

## Supplementary Information for

### Pt Quantum Dots Deposited on N-Doped (BiO)<sub>2</sub>CO<sub>3</sub>: Enhanced Visible Light Photocatalytic NO Removal and Reaction Pathway

Xing'an Dong,<sup>a</sup> Wendong Zhang,<sup>b</sup> Wen Cui,<sup>a</sup> Yanjuan Sun,<sup>a</sup> Hongwei Huang,<sup>c</sup> Zhongbiao Wu,<sup>d</sup> and  
Fan Dong<sup>\*,a</sup>

<sup>a</sup> Chongqing Key Laboratory of Catalysis and New Environmental Materials, College of Environment and Resources, Chongqing Technology and Business University, Chongqing 400067, China.

<sup>b</sup> Department of Scientific Research Management, Chongqing Normal University, Chongqing, 401331, China.

<sup>c</sup> National Laboratory of Mineral Materials, School of Materials Science and Technology, China University of Geosciences, Beijing 100083, China.

<sup>d</sup> Department of Environmental Engineering, Zhejiang University, Hangzhou 310027, China.

\*Corresponding authors. E-mail address: dfctbu@126.com (Fan Dong).

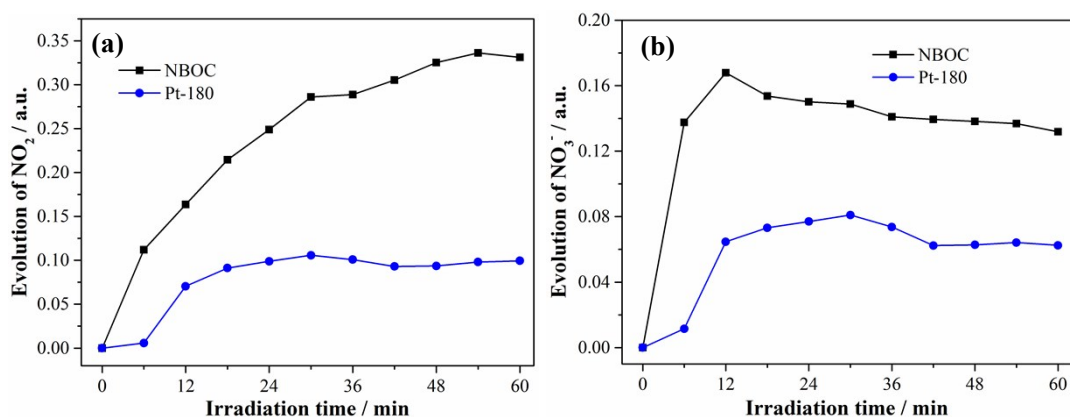

**Fig. S1** Evolution of NO<sub>2</sub> (a) and nitrates (b) on the catalyst (The data were derived from Fig. 9).

**Photocatalytic decomposition of phenol.** Fifty milligrams of the photocatalyst were ultrasonically dispersed in 50 mL of the phenol aqueous solution (10 mg/L). Before light irradiation, the suspension was magnetically stirred in darkness for 1 h to achieve an absorption-desorption equilibrium. Afterward, the light (500 W xenon lamp,  $\lambda > 420$  nm) was turned on. At certain time interval, 3 mL of the suspension was sampled and centrifuged to get rid of the solid particles. Finally, the concentration of phenol was determined by colorimetry on a UV-5500PC UV-vis spectrophotometer. The concentration of phenol was analyzed by recording the absorbance at the characteristic band of 270 nm using a Cary 5000 UV-vis spectrophotometer.

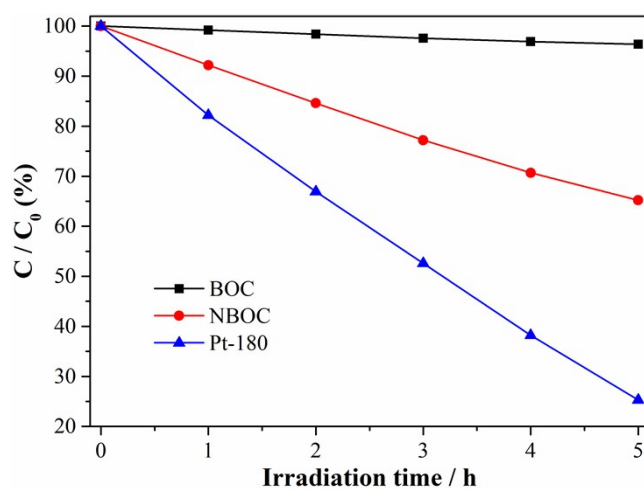

**Fig. S2** Photocatalytic degradation curves of phenol over BOC, NBOC and Pt-180 under visible light irradiation.

The degradation curves of phenol are shown in Fig. S2. The pure BOC exhibits a little photodegradation efficiency under visible light ( $\lambda > 420$  nm). Comparatively, the NBOC showed improved photocatalytic performance with a removal ratio of 34.8% due to the N doping. Specifically, Pt-180 exhibits further enhanced photocatalytic activity, in which the phenol removal ratio reaches 74.7% with irradiation of visible light for 5 h.
